# Supplementary material for: Antioxidant Activity of Biogenic Cinnamic Acid Derivatives in Polypropylene
Source: MDPI journal article supplement (doi:10.3390/polym15173621), 2023-09-01
Supplement: s1 [file s1]

# Antioxidant Activity of Biogenic Cinnamic Acid Derivatives in Polypropylene

Jannik Mayer <sup>1</sup>, René Steinbrecher <sup>2</sup>, Elke Metzsch-Zilligen <sup>1</sup> and Rudolf Pfaendner <sup>1,\*</sup>

<sup>1</sup> Division Plastics, Fraunhofer Institute for Structural Durability and System Reliability LBF, Schlossgartenstraße 6, D-64289 Darmstadt, Germany

<sup>2</sup> Department Chemistry, University of Potsdam, Karl-Liebknecht-Str. 24-25, House 25, D-14476 Potsdam, Germany

\* Correspondence: rudolf.pfaendner@lbf.fraunhofer.de

## 1. <sup>1</sup>H- and <sup>13</sup>C-NMR spectra of chemicals

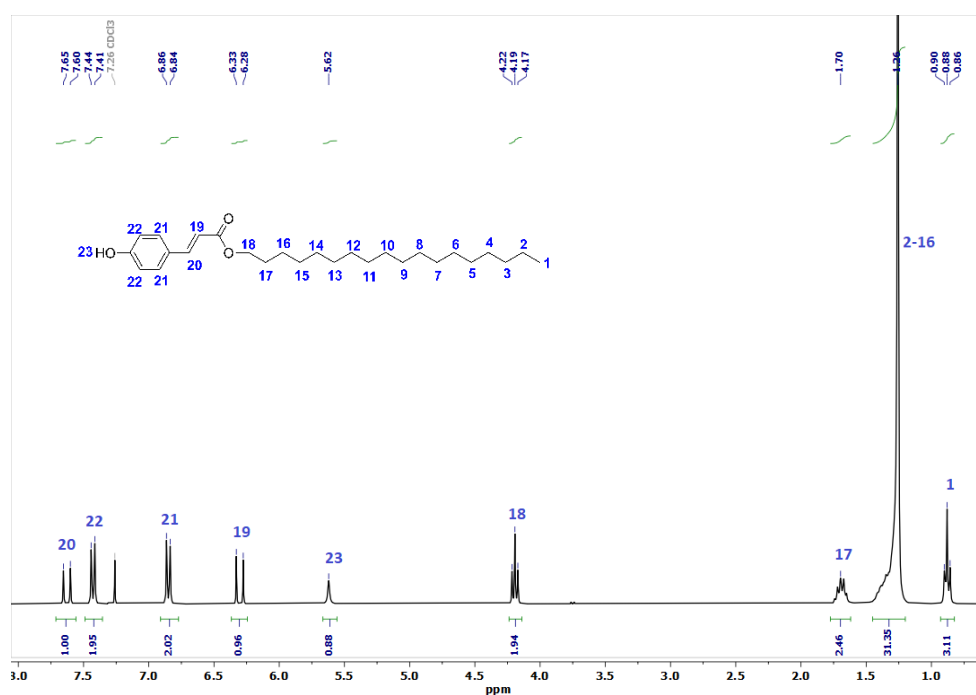

Figure S1 <sup>1</sup>H NMR of Hzoed in Chloroform-d.

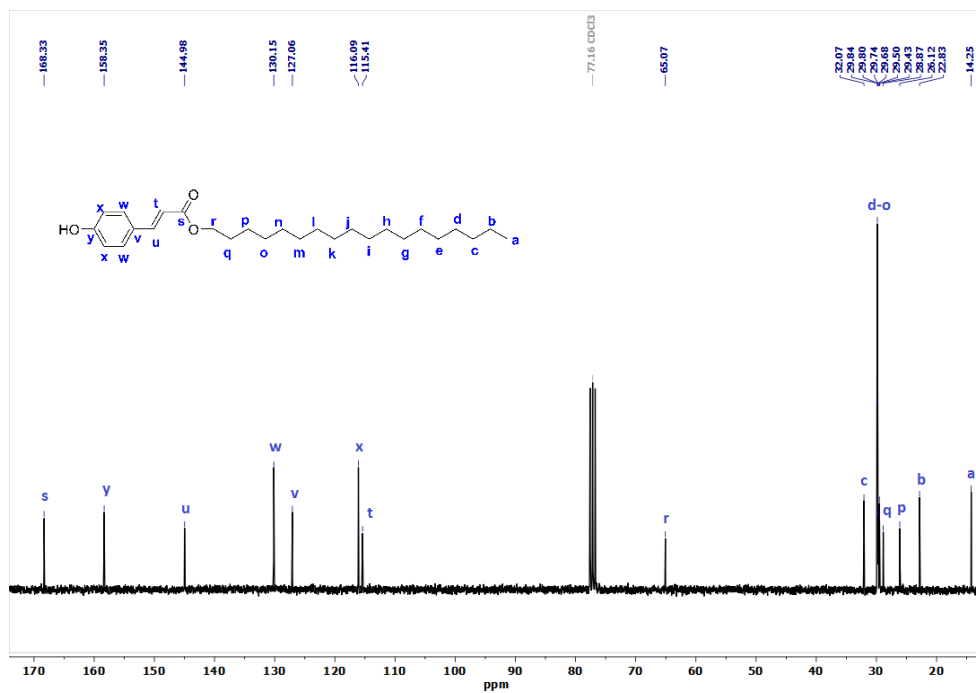

Figure S2 <sup>13</sup>C NMR of Hzocd in Chloroform-d.

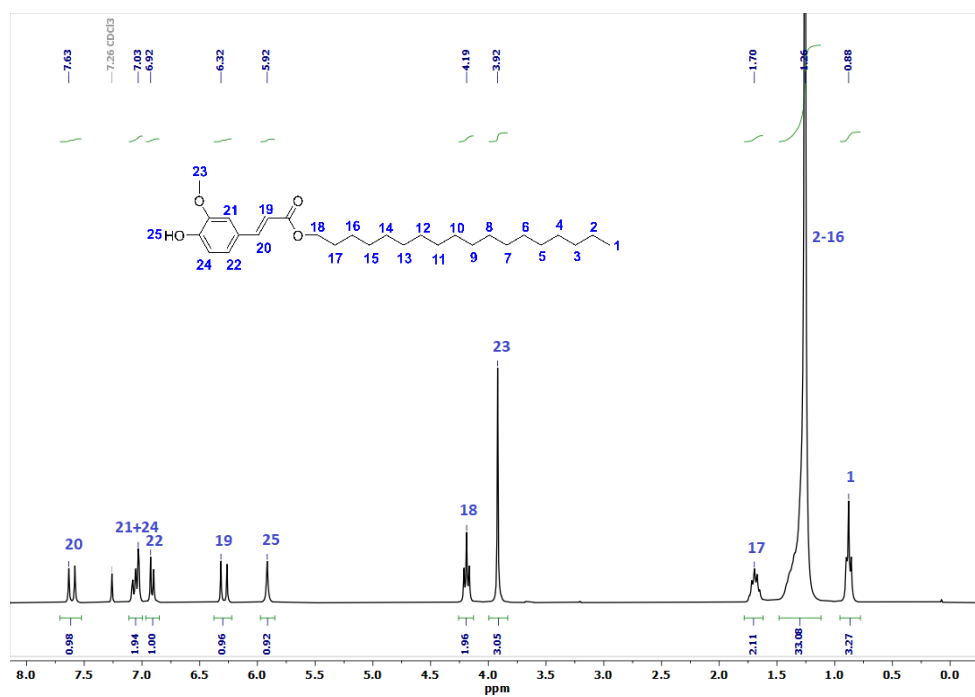

Figure S3 <sup>1</sup>H NMR of FaSa in Chloroform-d.

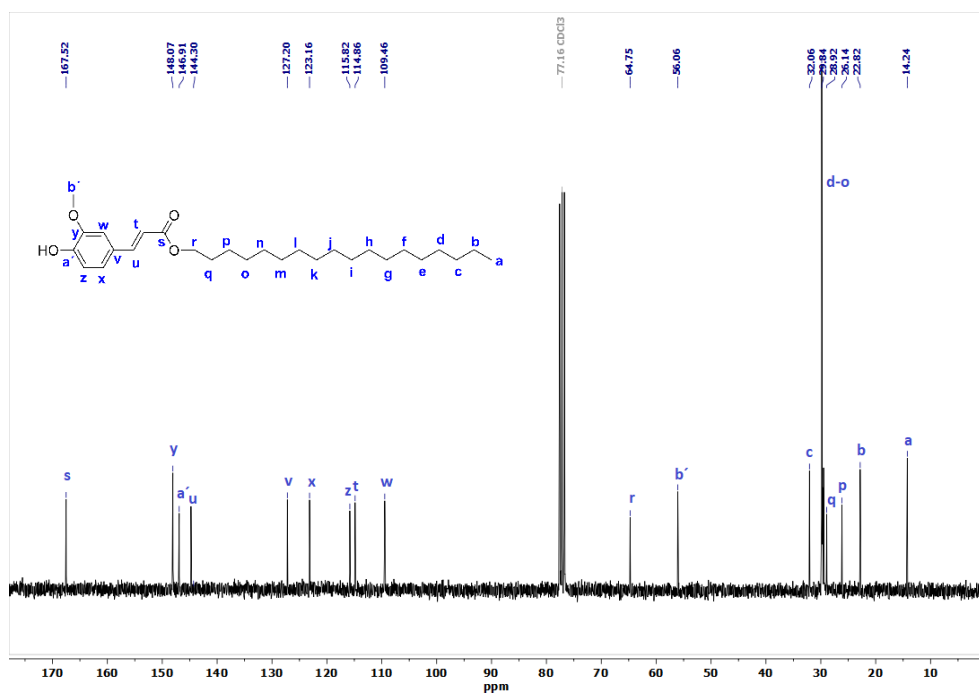

**Figure S4**  $^{13}\text{C}$  NMR of FaSa in Chloroform-d.

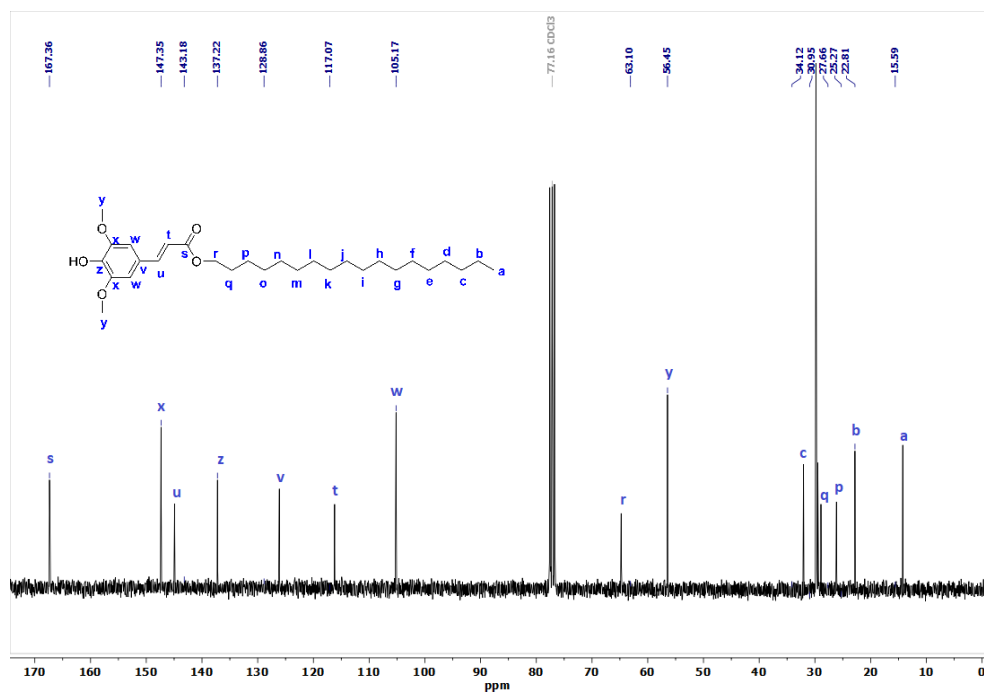

**Figure S5**  $^{13}\text{C}$  NMR of SinSa in Chloroform-d.

## 2. FTIR spectra

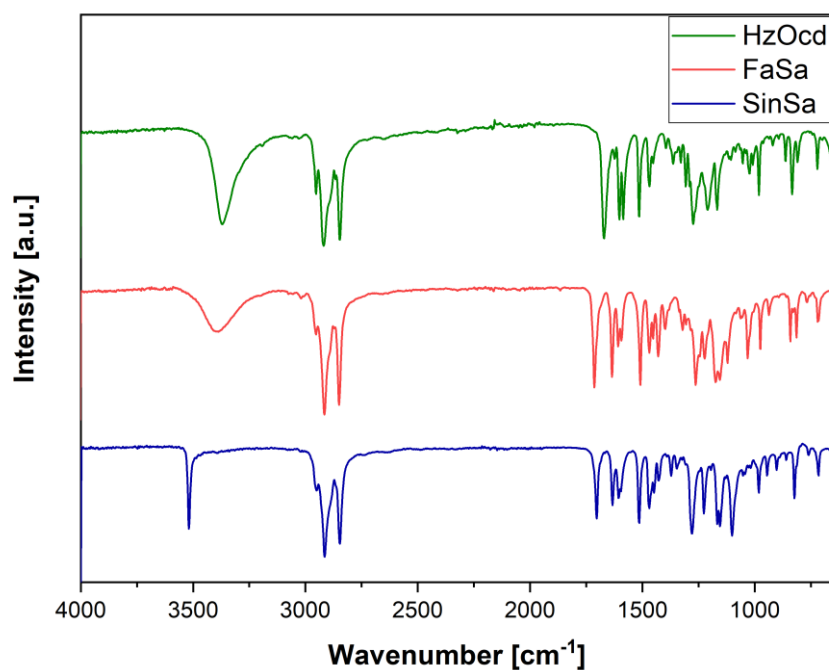

Figure S6 FTIR spectra of the synthesized hydroxycinnamic acid stearyl esters.

## 3. DPPH assay

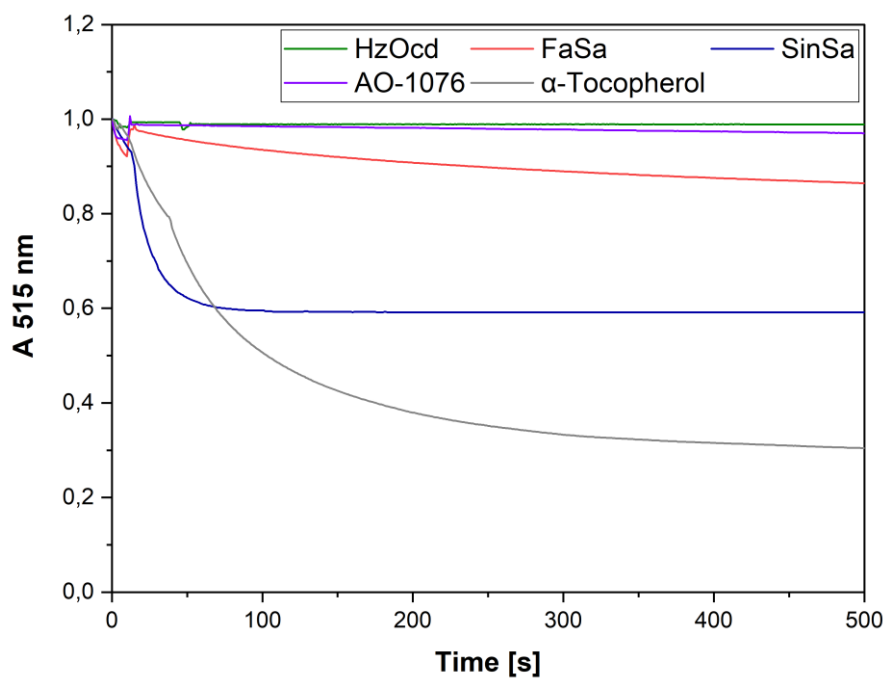

Figure S7 Decoloration kinetic curves of the examined antioxidants in the DPPH assay.

## 4. Performance as processing stabilizer

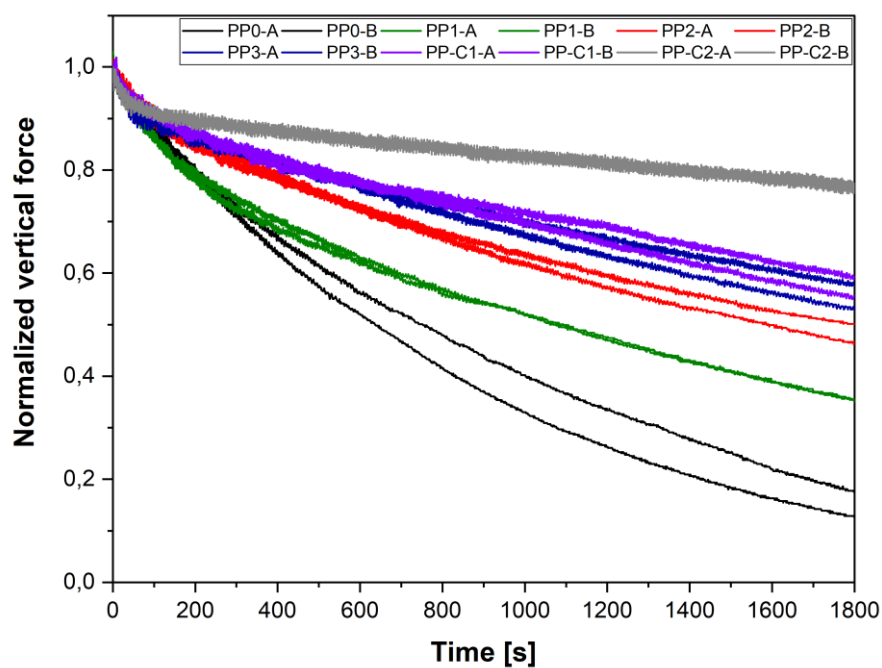

**Figure S8** Obtained normalized vertical forces during 30 min micro-compounding with 200 °C and 200 rpm. Each compound is measured twice.

## 5. Long-term stability during accelerated aging

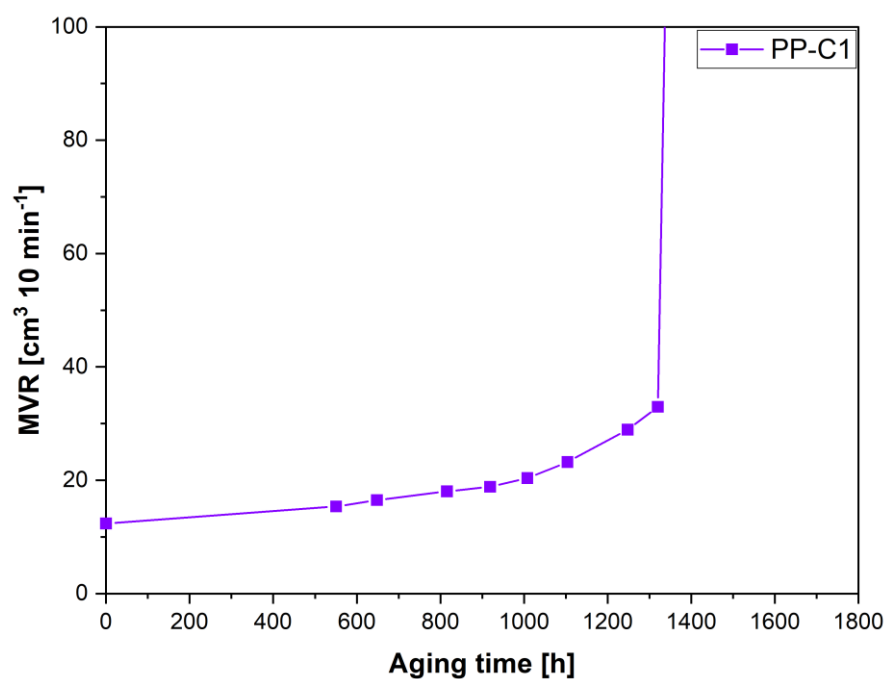

**Figure S9** MVR values (2.16 kg/230 °C) during aging at 150 °C.

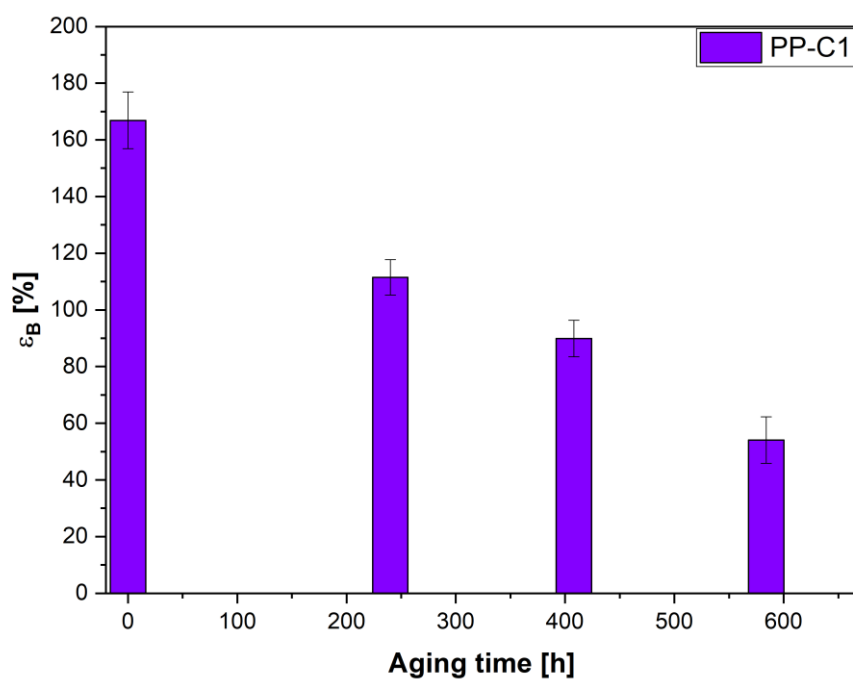

**Figure S10** Elongation at break during aging at 150 °C.
